# Supplementary material for: Doing More with Less: A Comparison of 16S Hypervariable Regions in Search of Defining the Shrimp Microbiota
Source: MDPI journal article supplement (doi:10.3390/microorganisms8010134), 2020-01-17
Supplement: s1 [file s1]

## Supplementary Figures

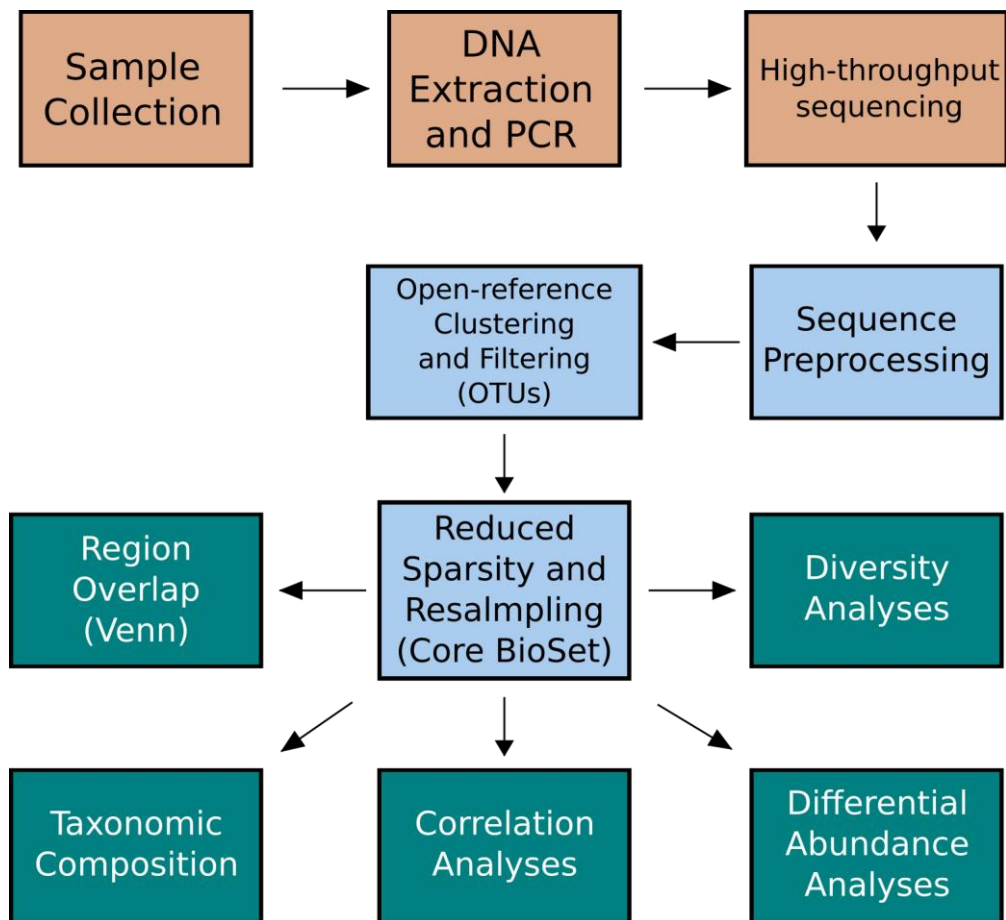

**Figure S1.** Workflow summary. Wet lab (experimental) procedures are shown in the brown panels. Blue panels show bioinformatic methods and green ones show the different set of analyses carried out for them.

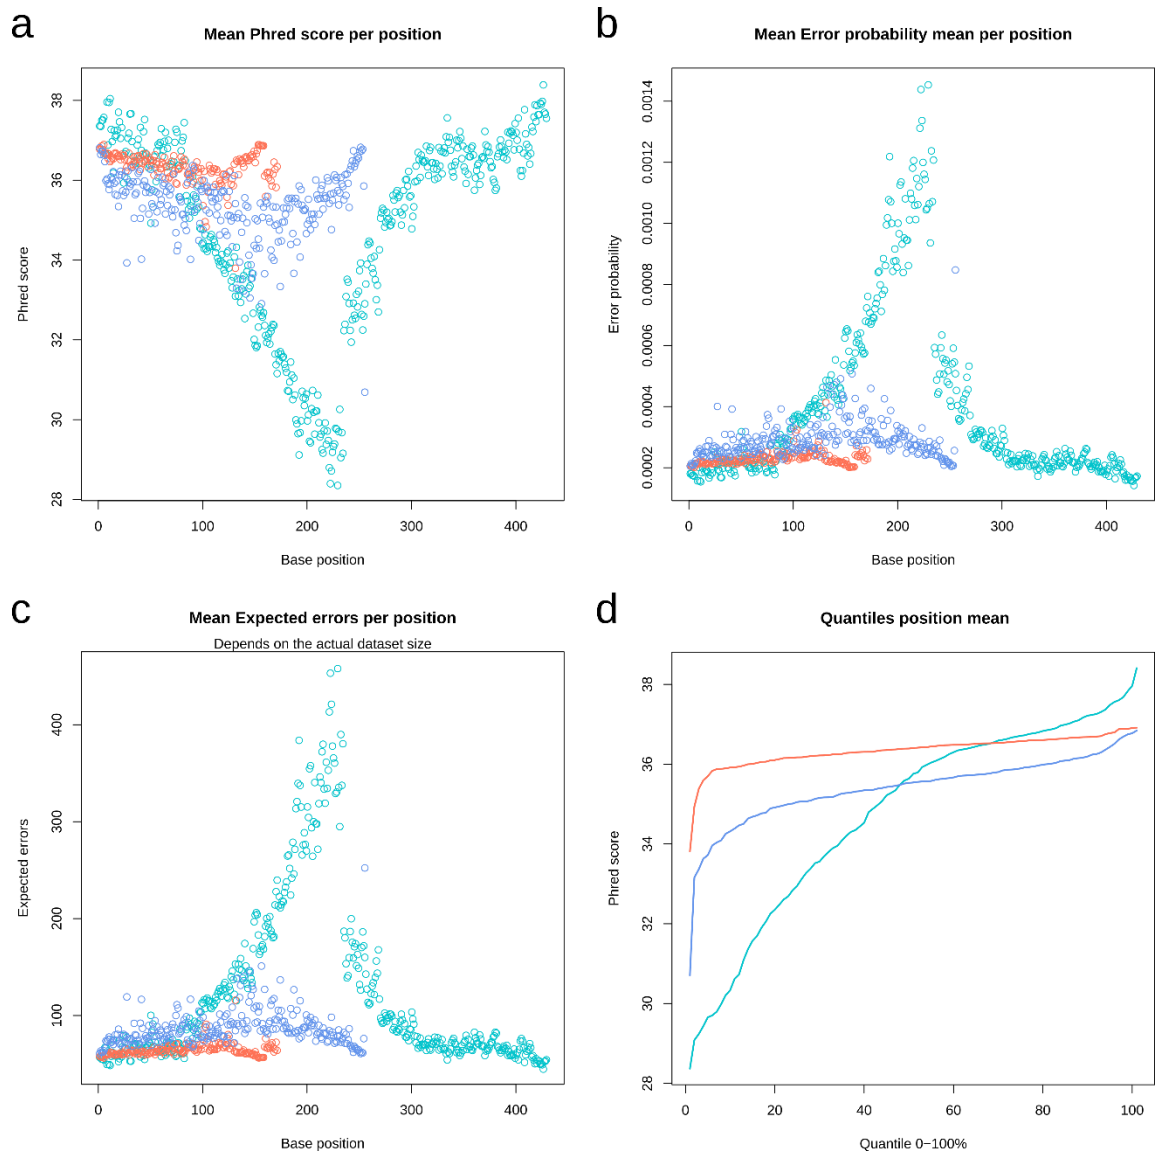

**Figure S2.** Sequence quality of each amplicon set. Reads are presented after sample preprocessing and paired-end joining. V3 is presented in coral, V4 in blue and V3V4 in aquamarine. **(a)** Average Phred quality scores at each position. **(b)** Error probability associated to the mean score in panel a. **(c)** Expected errors calculated based on the error probabilities and the total reads in each region set. **(d)** Position quality mean quantiles 1–100%.

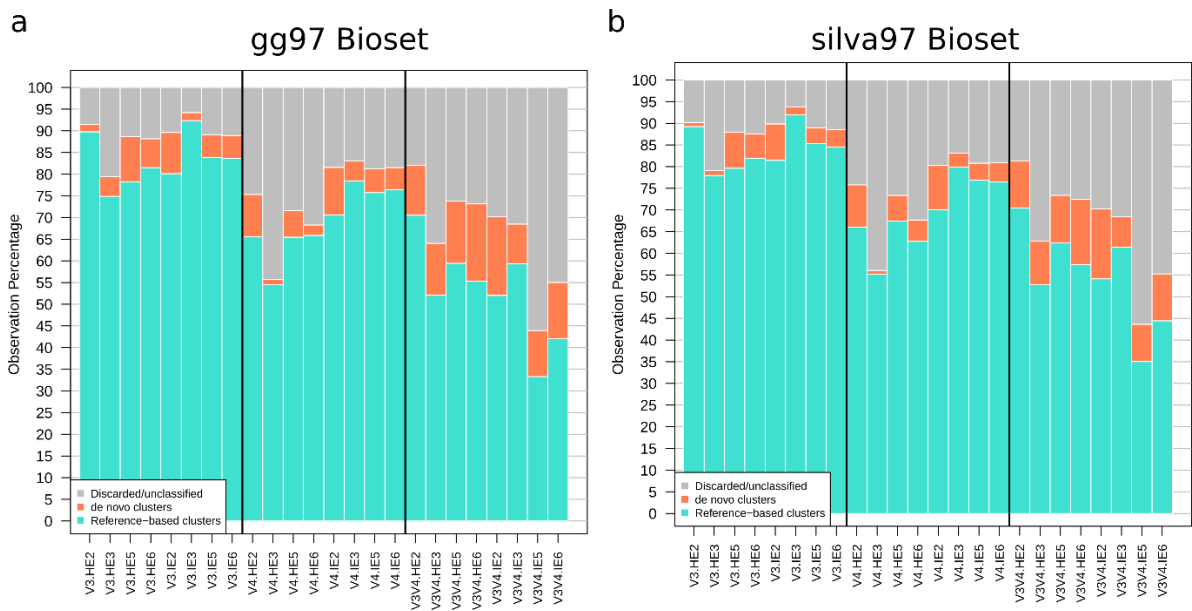

**Figure S3.** Percentage of items grouped into OTUs in the gg97 (a) and silva97 (b) BioSets. Barplots are shown for each sample reflecting the proportion of input reads that were assigned to valid clusters. Samples are grouped by region (left: V3; center: V4; right: V3V4). Type of OTUs are colored by reference-based clusters (turquoise) and de novo clusters (coral). Gray bars represent features that were discarded or non assigned to any clusters.

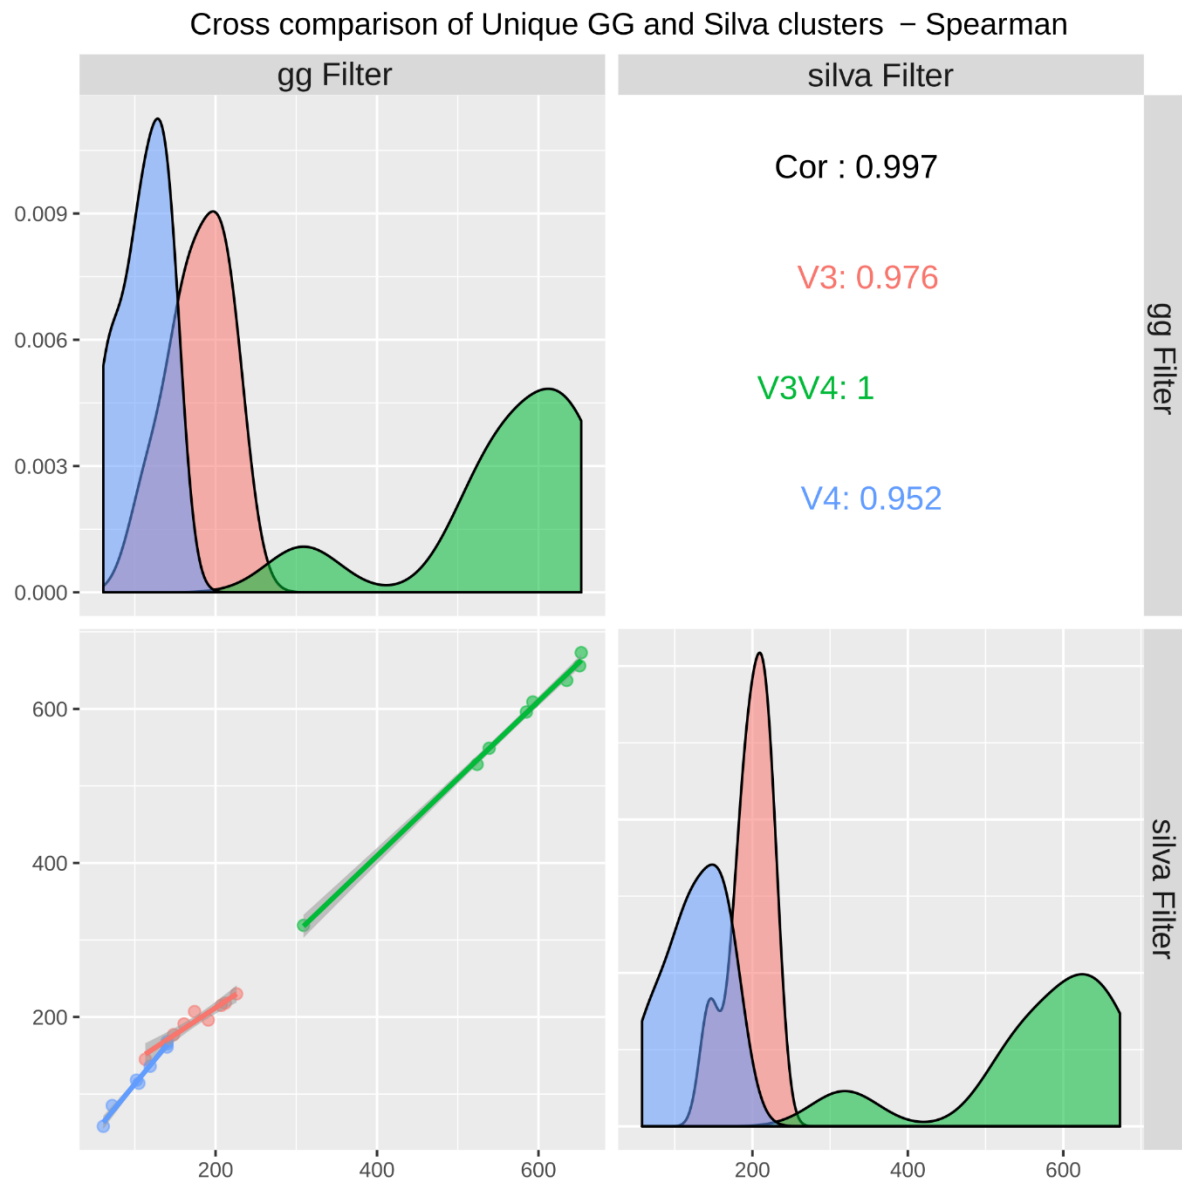

**Figure S4.** Correlation of total unique OTUs between gg97 and silva97 BioSets. All comparisons are broken down by region (pink: V3, blue: V4, green: V3V4). Density plots depict the distribution of total items per sample in the three regions. The linear regression functions depict the relation of both sets by comparing each region subset. Correlations for the whole table and the three regions are included.

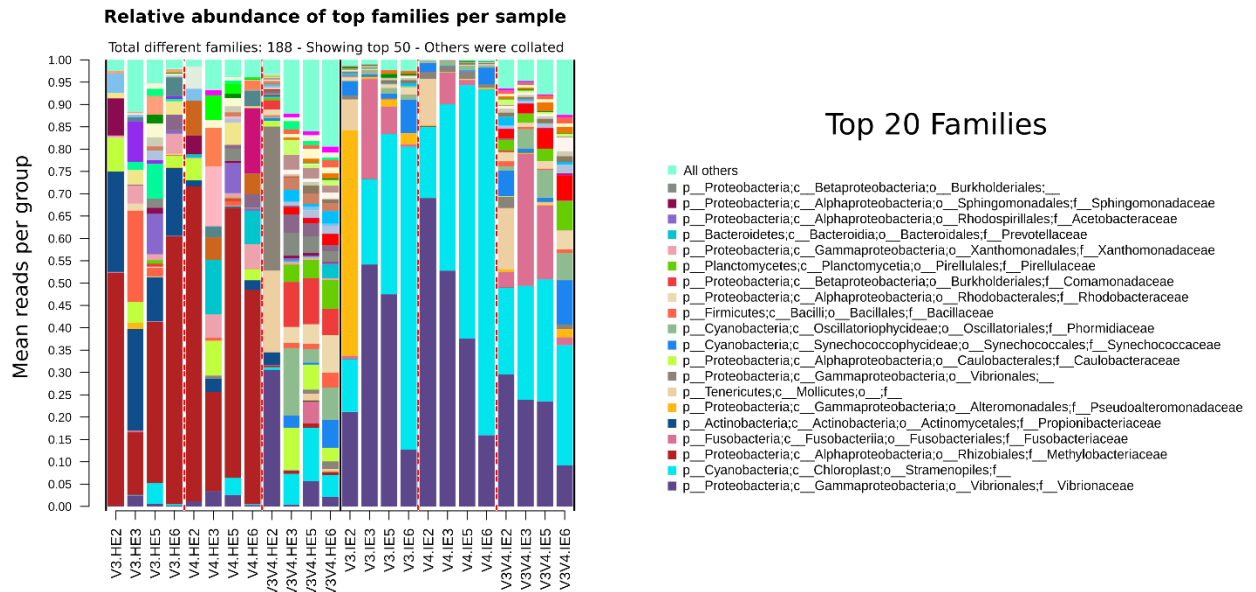

**Figure S5.** Family relative abundance per sample. Families are presented in order of their total abundance in the table. Only top 50 are shown and labels for the top 20 are presented; the sum of the rest are shown as All others. Samples are presented by organ-region groups.

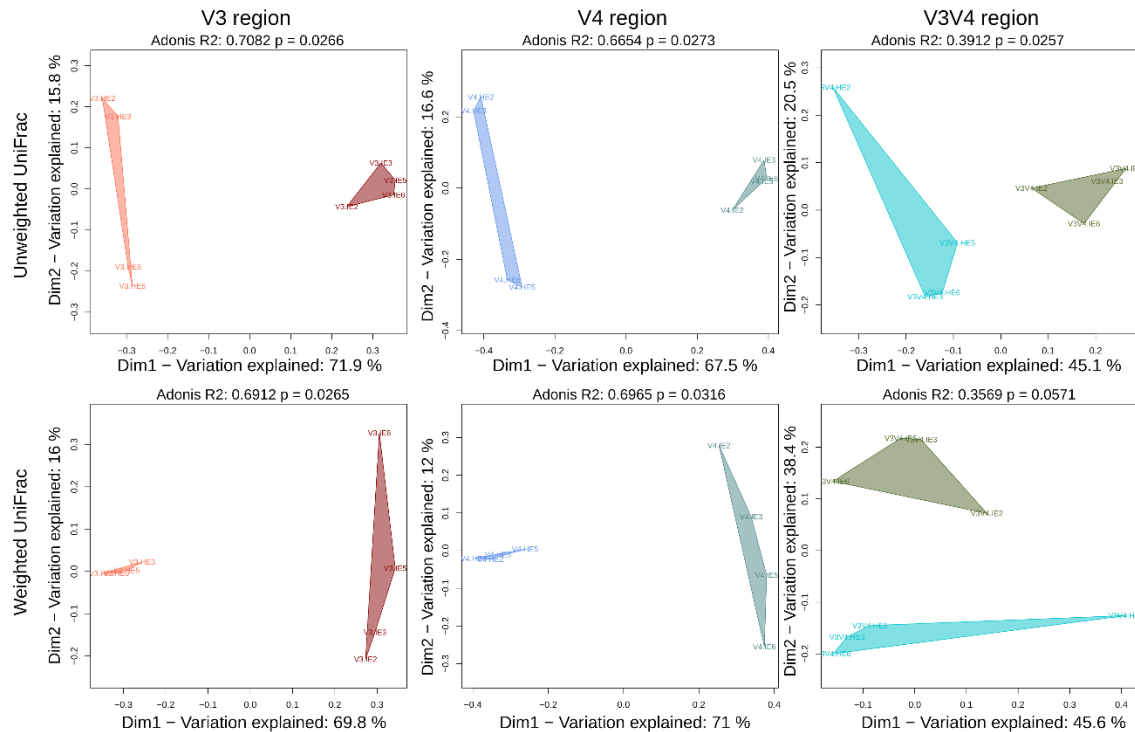

**Figure S6.** PCoA of phylogenetically-defined differences in OTU composition and abundance by region. PCoA from weighted and unweighted UniFrac of the three region sample subsets. Phylogenetic information was only relevant when analyzed per region since representative sequences were primer-specific. (Legend): V3-H: hepatopancreas samples in the V3 region subset, V4-H: hepatopancreas samples in the V4 region subset, V3V4-H: hepatopancreas samples in the V3V4 region subset, V3-I: intestine samples in the V3 region subset, V4-I: intestine samples in the V4 region subset, V3V4-I: intestine samples in the V3V4 region subset.

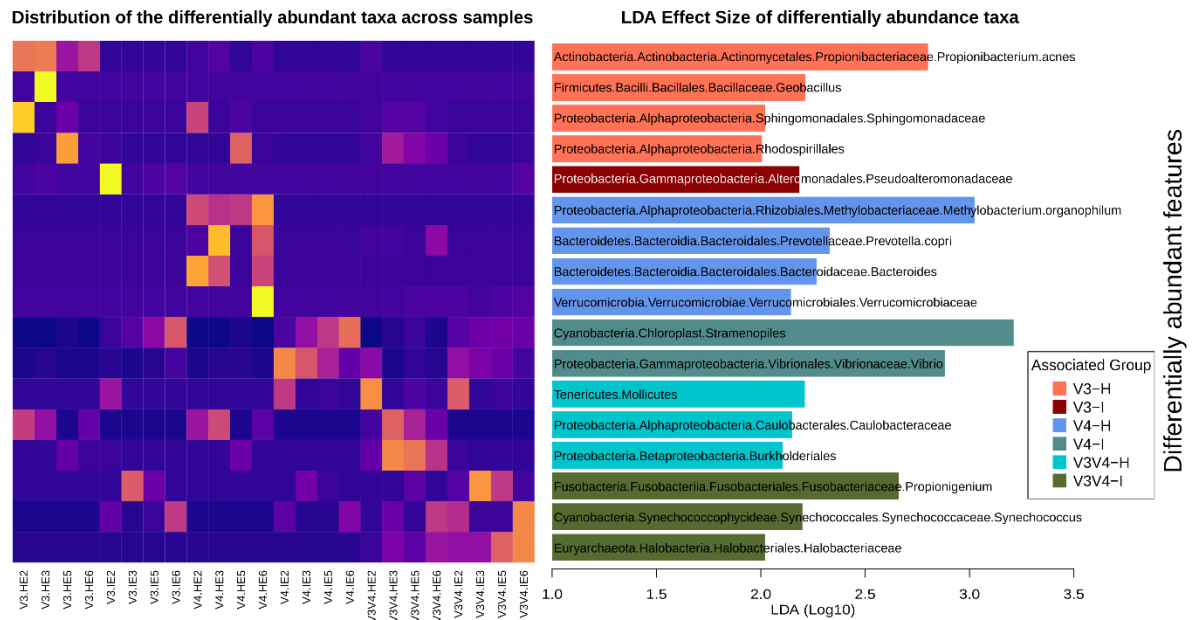

**Figure S7.** Distribution of differentially abundant multi-level taxa selected by the LDA Effect Size (LEfSe) associated to region-organ sample groups. The heatmap represents the scaled distribution of each taxa across the samples, that is differentially associated to a group by their LEfSe. Shown taxa are preferentially detected in the indicated region-organ group. Color intensity (warmth) represents relative abundances (dark blue = 0 to light yellow = 1). LDA is on a log10 scale and features with an effect size >2 are shown. Only the highest taxonomic levels bearing any informative taxonomic labels are shown (from phylum to the highest level available for each taxon using the greengenes' nomenclature).



**Figure S8.** Distribution of differentially abundant multi-level taxa selected by the LDA Effect Size (LEfSe) associated to split region and organ groups. Each sample subset (organ and region group) of the species table of the core gg97 BioSet table was analyzed independently of the rest of the samples. The heatmap represents the scaled distribution of each taxa across the samples, that is differentially associated to a group by their LEfSe. Shown taxa are preferentially detected in the indicated region-organ group. Color intensity (warmth) represents relative abundances (dark blue = 0 to light yellow = 1). LDA is on a log10 scale and features with an effect size >2 are shown. Only the highest taxonomic levels bearing any informative taxonomic labels are shown (from phylum to the highest level available for each taxon using the greengenes' nomenclature). (a) Differentially abundant taxa associated to each region when only hepatopancreas samples are considered. (b) Differentially abundant taxa associated to each region when only intestine samples are considered. (c) Differentially abundant taxa associated to each organ when only V3 samples are considered. (d) Differentially abundant taxa associated to each organ when only V4 samples are considered. (e) Differentially abundant taxa associated to each organ when only V3V4 samples are considered.
